# Supplementary material for: Effects of Anxious Depression on Antidepressant Treatment Response
Source: MDPI journal article supplement (doi:10.3390/ijms242417128), 2023-12-05
Supplement: s1 [file s1]

**Table S1. Demographic overview of drug-specific subsamples.** Detailed drug-specific demographics for amitriptyline, mirtazapine, sertraline and venlafaxine for week 1 and week 7.

| Week 1 (Baseline)                            | N             | Mean $\pm$ SD (range)      | N           | Mean $\pm$ SD (range)         |
|----------------------------------------------|---------------|----------------------------|-------------|-------------------------------|
|                                              | Amitriptyline |                            | Mirtazapine |                               |
| Included patients                            | 68            |                            | 110         |                               |
| Age [years]                                  | 68            | 47.50 $\pm$ 13.06 (18-73)  | 110         | 48.75 $\pm$ 16.61 (18-80)     |
| male/female                                  | 34/34         |                            | 46/64       |                               |
| Duration of disorder [years]                 | 66            | 12.41 $\pm$ 10.94 (0.3-40) | 106         | 14.18 $\pm$ 13.62 (0.3-60)    |
| Dose [mg]                                    | 68            | 74.26 $\pm$ 43.33 (25-225) | 110         | 26.18 $\pm$ 12.54 (3-60)      |
| Serum concentration [ng/ml]                  | 45            | 66.49 $\pm$ 51.65 (0-236)  | 70          | 34.97 $\pm$ 20.32 (6-110)     |
| Normal dose range [mg]                       |               | 50-150                     |             | 15-45                         |
| Normal serum levels [ng/ml]                  |               | 80-200                     |             | 30-80                         |
| HDRS-21 Baseline                             | 68            | 24.27 $\pm$ 7.53 (7-39)    | 110         | 26.85 $\pm$ 7.52 (9-46)       |
| HDRS-21 Out                                  | 67            | 12.42 $\pm$ 7.25 (2-33)    | 109         | 10.14 $\pm$ 6.60 (0-27)       |
| Responder/Nonresponder (Out)                 | 37/29         |                            | 71/37       |                               |
| HDRS anxiety-somatization factor Baseline    | 68            | 6.60 $\pm$ 2.91 (1-13)     | 110         | 7.27 $\pm$ 3.16 (0-15)        |
| HDRS-21 anxiety-somatization factor Out      | 82            | 3.23 $\pm$ 2.43 (0-9)      | 108         | 2.99 $\pm$ 2.51 (0-10)        |
| aMDD/naMDD Baseline                          | 41/27         |                            | 68/42       |                               |
| aMDD/naMDD Out                               | 9/57          |                            | 12/96       |                               |
|                                              | Sertraline    |                            | Venlafaxine |                               |
|                                              |               |                            |             |                               |
| Included patients                            | 33            |                            | 154         |                               |
| Age [years]                                  | 33            | 52.33 $\pm$ 14.93 (19-75)  | 154         | 43.60 $\pm$ 14.32 (18-80)     |
| male/female                                  | 12/21         |                            | 65/89       |                               |
| Duration of disorder [years]                 | 32            | 14.63 $\pm$ 13.81 (0.5-49) | 150         | 14.14 $\pm$ 11.95 (0.4-48)    |
| Dose [mg]                                    | 33            | 78.94 $\pm$ 41.52 (5-200)  | 154         | 162.25 $\pm$ 87.63 (37.5-375) |
| Serum concentration [ng/ml]                  | 19            | 30.21 $\pm$ 18.42 (4-73)   | 108         | 93.81 $\pm$ 124.40 (0-616)    |
| Normal dose range [mg]                       |               | 50-200                     |             | 75-225                        |
| Normal serum levels [ng/ml]                  |               | 10-150                     |             | 100-400                       |
| HDRS-21 Baseline                             | 33            | 25 $\pm$ 7.56 (11-39)      | 154         | 24.39 $\pm$ 7.66 (7-46)       |
| HDRS-21 Out                                  | 33            | 11.72 $\pm$ 7.29 (1-33)    | 150         | 9.97 $\pm$ 6.35 (0-27)        |
| Responder/Nonresponder (Out)                 | 18/15         |                            | 101/45      |                               |
| HDRS-21 anxiety-somatization factor Baseline | 33            | 6.85 $\pm$ 2.85 (1-14)     | 151         | 6.40 $\pm$ 2.88 (0-14)        |
| HDRS-21 anxiety-somatization factor Out      | 33            | 3.18 $\pm$ 2.49 (0-10)     | 148         | 2.45 $\pm$ 2.34 (0-10)        |
| aMDD/naMDD Baseline                          | 17/16         |                            | 74/77       |                               |

|                |      |  |       |  |
|----------------|------|--|-------|--|
| aMDD/naMDD Out | 4/29 |  | 9/139 |  |
|----------------|------|--|-------|--|

| Week 7 (Out)                                 | N             | Mean $\pm$ SD (range)       | N           | Mean $\pm$ SD (range)         |
|----------------------------------------------|---------------|-----------------------------|-------------|-------------------------------|
|                                              | Amitriptyline |                             | Mirtazapine |                               |
| Included patients                            | 84            |                             | 98          |                               |
| Age [years]                                  | 84            | 46.90 $\pm$ 13.49 (18-75)   | 98          | 48.81 $\pm$ 16.59 (18-80)     |
| male/female                                  | 39/45         |                             | 43/55       |                               |
| Duration of disorder [years]                 | 82            | 12.13 $\pm$ 12.83 (0.5-60)  | 95          | 14.20 $\pm$ 13.34 (0-60)      |
| Dose [mg]                                    | 84            | 107.74 $\pm$ 44.09 (25-225) | 98          | 35.10 $\pm$ 12.26 (7.5-60)    |
| Serum concentration [ng/ml]                  | 71            | 82.44 $\pm$ 32.52 (14-151)  | 72          | 42.60 $\pm$ 17.12 (0-94)      |
| Normal dose range [mg]                       |               | 50-150                      |             | 15-45                         |
| Normal serum levels [ng/ml]                  |               | 80-200                      |             | 30-80                         |
| HDRS-21 Baseline                             | 84            | 25.96 $\pm$ 7.47 (7-43)     | 98          | 26.29 $\pm$ 7.45 (9-46)       |
| HDRS-21 Out                                  | 83            | 12.77 $\pm$ 7.04 (2-38)     | 97          | 9.39 $\pm$ 6.54 (0-27)        |
| Responder/Nonresponder                       | 47/37         |                             | 72/26       |                               |
| HDRS-21 anxiety-somatization factor Baseline | 84            | 6.93 $\pm$ 2.61 (1-13)      | 98          | 7.19 $\pm$ 3.07 (1-14)        |
| HDRS-21 anxiety-somatization factor Out      | 82            | 3.43 $\pm$ 2.43 (0-10)      | 97          | 2.96 $\pm$ 2.48 (0-10)        |
| aMDD/naMDD Baseline                          | 52/32         |                             | 59/39       |                               |
| aMDD/naMDD Out                               | 11/72         |                             | 10/87       |                               |
|                                              |               | Sertraline                  | Venlafaxine |                               |
| Included patients                            | 35            |                             | 166         |                               |
| Age [years]                                  | 35            | 47.37 $\pm$ 16.17 (18-75)   | 166         | 43.62 $\pm$ 14.48 (18-76)     |
| male/female                                  | 12/23         |                             | 67/99       |                               |
| Duration of disorder [years]                 | 35            | 11.09 $\pm$ 9.93 (0.2-41)   | 162         | 13.75 $\pm$ 11.97 (0.4-49)    |
| Dose [mg]                                    | 35            | 145.71 $\pm$ 63.66 (25-250) | 166         | 258.89 $\pm$ 98.89 (37.5-525) |
| Serum concentration [ng/ml]                  | 33            | 69.12 $\pm$ 55.49 (0-242)   | 152         | 159.39 $\pm$ 144.05 (7-589)   |
| Normal dose range                            |               | 50-200                      |             | 75-225                        |
| Normal serum levels [ng/ml]                  |               | 10-150                      |             | 100-400                       |
| HDRS-21 Baseline                             | 35            | 26.83 $\pm$ 7.40 (9-42)     | 166         | 24.54 $\pm$ 7.68 (7-46)       |
| HDRS-21 Out                                  | 35            | 11.31 $\pm$ 6.41 (1-25)     | 163         | 10.23 $\pm$ 6.50 (0-27)       |
| Responder/Nonresponder                       | 20/15         |                             | 106/60      |                               |
| HDRS-21 anxiety-somatization factor Baseline | 35            | 7.71 $\pm$ 2.99 (1-14)      | 163         | 6.31 $\pm$ 2.78 (1-14)        |
| HDRS-21 anxiety-somatization factor Out      | 34            | 3.12 $\pm$ 2.40 (0-10)      | 161         | 2.58 $\pm$ 2.42 (0-10)        |
| aMDD/naMDD Baseline                          | 22/13         |                             | 79/84       |                               |
| aMDD/naMDD Out                               | 4/31          |                             | 13/148      |                               |

N, number of patients; SD, standard deviation; HDRS, Hamilton Depression Rating Scale; aMDD, anxious depressed patients; naMDD, non-anxious depressed patients.

**Table S2. Overview of all administered psychiatric drugs.**

| Psychiatric Drug       | N (Dose) | N (Concentration) | Psychiatric Drug      | N (Dose) | N (Concentration) |
|------------------------|----------|-------------------|-----------------------|----------|-------------------|
| <b>Antidepressants</b> |          |                   | <b>Antipsychotics</b> |          |                   |
| Venlafaxine            | 166      | 152               | Quetiapine            | 162      | 131               |
| Mirtazapine            | 98       | 72                | Aripiprazole          | 26       | 20                |
| Amitriptyline          | 84       | 71                | Risperidone           | 23       | 12                |
| Sertraline             | 35       | 32                | Olanzapine            | 19       | 17                |
| Bupropion              | 29       | 16                | Promethazine          | 3        | 3                 |
| Escitalopram           | 22       | 20                | Melperone             | 3        | 2                 |
| Clomipramine           | 16       | 14                | Pipamperone           | 3        | 2                 |
| Trazodon               | 15       | 12                | Perazine              | 2        | 0                 |
| Doxepin                | 13       | 13                | Ziprasidone           | 1        | 1                 |
| Duloxetine             | 13       | 9                 | Clozapine             | 1        | 0                 |
| Milnacipran            | 5        | 4                 | <b>Antiepileptics</b> |          |                   |
| Nortriptyline          | 5        | 4                 | Pregabalin            | 33       | 17                |
| Trimipramine           | 4        | 3                 | Lamotrigine           | 14       | 12                |
| Fluoxetine             | 1        | 1                 | Valproic Acid         | 13       | 10                |
| Maprotiline            | 1        | 1                 | Gabapentine           | 6        | 3                 |
|                        |          |                   | Levetiracetam         | 1        | 1                 |
|                        |          |                   | Zonisamide            | 1        | 1                 |
|                        |          |                   | Topiramate            | 1        | 0                 |

N, number of dose and serum concentration data available for the evaluation.
